# Supplementary material for: PDMS/camphor soot composite coating: towards a self-healing and a self-cleaning superhydrophobic surface
Source: Royal Society of Chemistry journal article supplement (doi:10.1039/c6ra28581c), 2017-01-01
Supplement: c6ra28581c4.pdf [file c6ra28581c4.pdf]

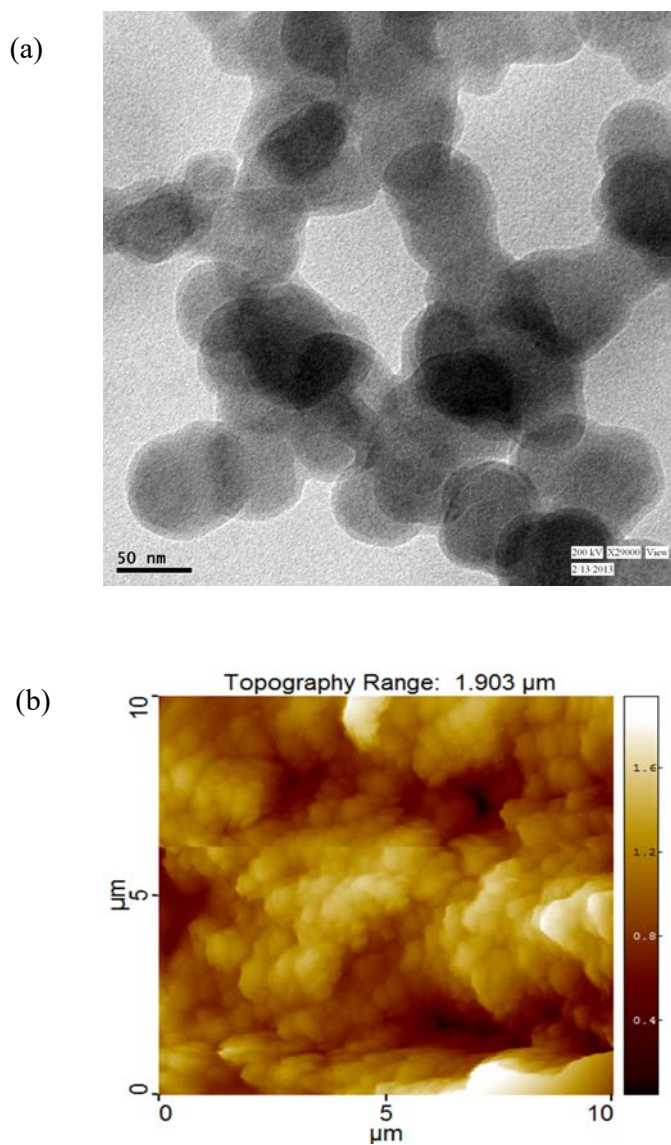

Figure S1. a) TEM image of camphor soot particles. b) AFM image of plain PDMS/camphor soot composite film

Table S1. The testing conditions for sand abrasion and corresponding static contact angle (WCA) for the tested samples.

| Sl. no | Hight (cm) | WCA (Degree) | $E_{\text{impinged}} \text{ (J)} \times 10^{-9}$ | $I_{\text{velocity}} \text{ (Km/h)}$ |
|--------|------------|--------------|--------------------------------------------------|--------------------------------------|
| 1      | 10         | 172±0.5      | 8.3                                              | 5.1                                  |
| 2      | 20         | 169±0.4      | 16.8                                             | 7.2                                  |
| 3      | 30         | 167±0.5      | 25.1                                             | 8.8                                  |
| 4      | 40         | 166±0.4      | 33.5                                             | 10.2                                 |
| 5      | 50         | 165±0.5      | 41.9                                             | 11.3                                 |
| 6      | 60         | 165±0.5      | 50.3                                             | 12.4                                 |
| 7      | 70         | 164±0.6      | 58.6                                             | 13.4                                 |

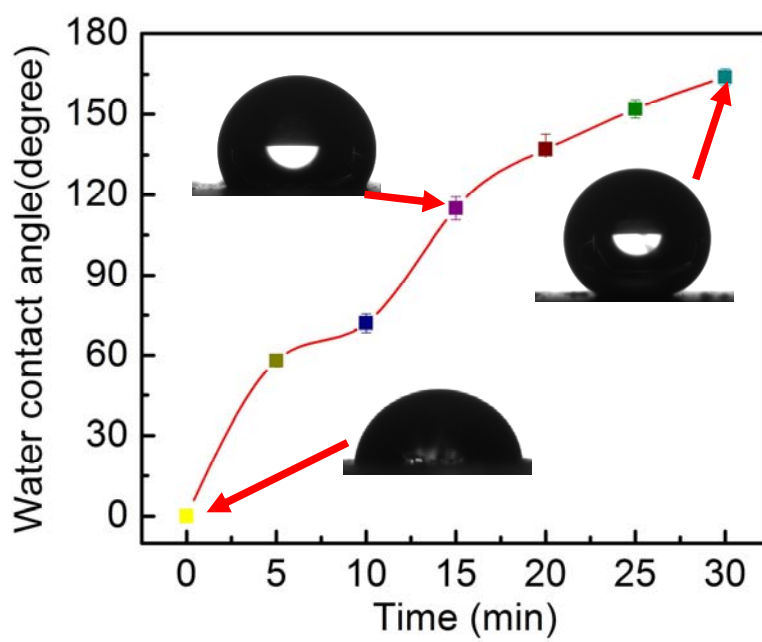

Figure S2. The variation of water CA on the O<sub>2</sub> plasma treated surface along with the healing time at 125 °C.

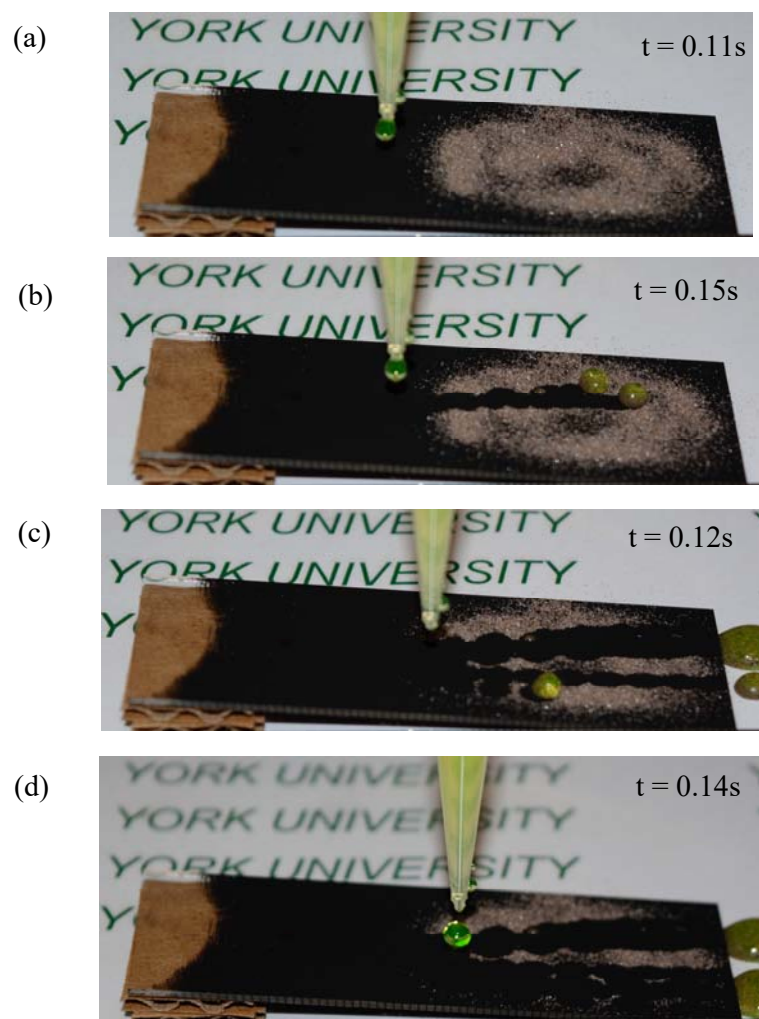

Figure S3. Time lapse snap shots for self-cleaning effect of plasma treated PDMS/camphor soot composite surface healed by heating (at  $TA = 4.6^{\circ}$ ).

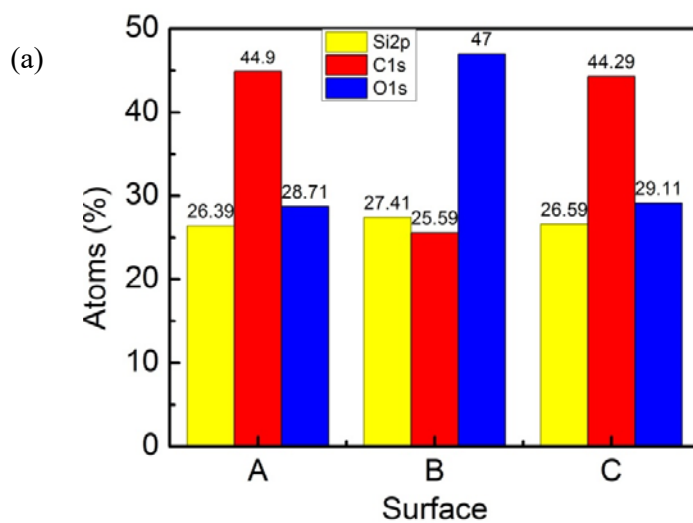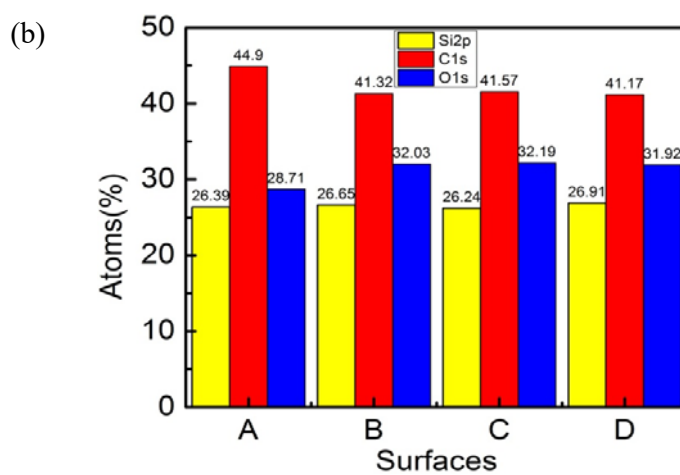

Figure S4. a) Atomic percentage of Si2p, C1s and O1s in A: PDMS/Camphor soot composite surface, B: Plasma treated PDMS/Camphor soot composite surface, C: same surface healed by heat. b) Atomic percentage of Si2p, C1s and O1s in A: PDMS/Camphor soot composite surface, B: 1M HNO<sub>3</sub> solution treated PDMS/Camphor soot composite surface, C: same surface healed by heat, D: Healed by THF and heat

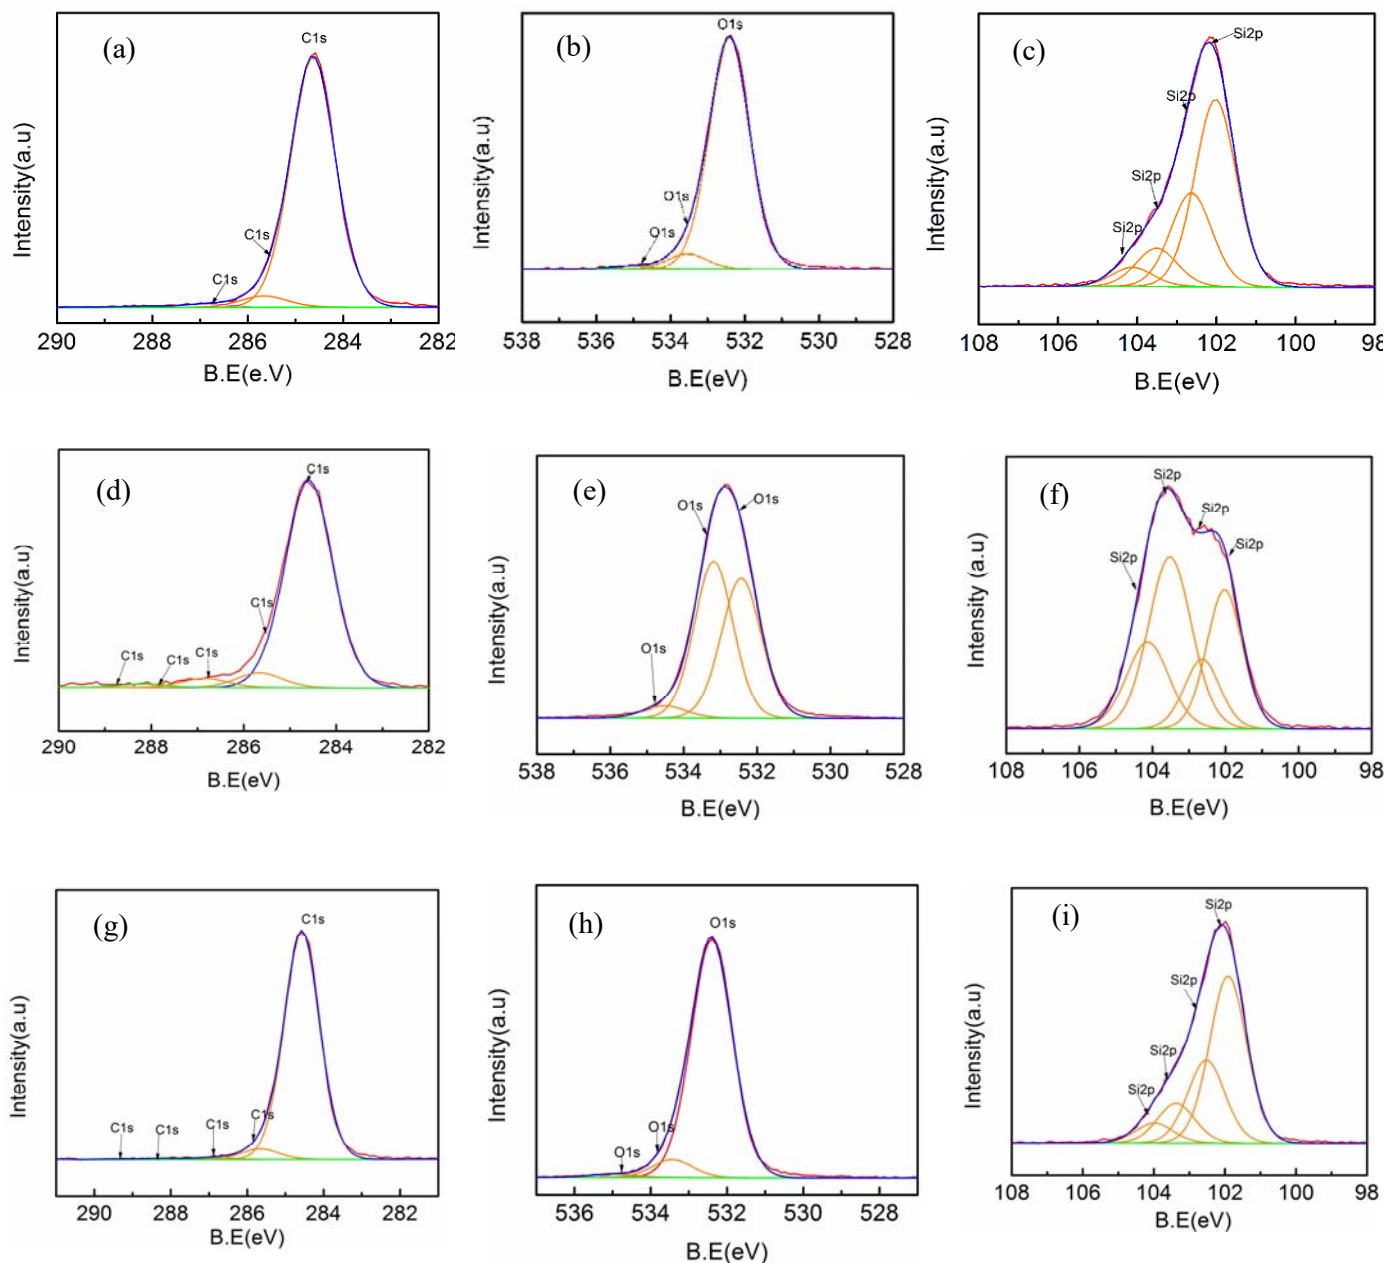

Figure S5. a) C1s spectra. b) O1s spectra. c) Si2p spectra of PDMS/camphor soot composite films, d) C1s spectra. e) O1s spectra. f) Si2p spectra of Plasma etched PDMS/camphor soot composite films, g) C1s spectra. h) O1s spectra. i) Si2p spectra of Plasma etched PDMS/camphor soot composite film healed by heat

Table S2 Atomic percentage of C1s, O1s and Si2p peaks of PDMS/camphor soot composite films, Plasma etched PDMS/camphor soot composite film healed by heat, Plasma etched PDMS/camphor soot composite films

|             | PDMS Composite film |                |                 | Plasma etched PDMS Composite film |                |                 | Plasma etched PDMS Composite film healed by heat |                |                 |
|-------------|---------------------|----------------|-----------------|-----------------------------------|----------------|-----------------|--------------------------------------------------|----------------|-----------------|
| <i>Name</i> | <i>Peak BE</i>      | <i>FWHM eV</i> | <i>Atomic %</i> | <i>Peak BE</i>                    | <i>FWHM eV</i> | <i>Atomic %</i> | <i>Peak BE</i>                                   | <i>FWHM eV</i> | <i>Atomic %</i> |
| Si2p3       | 102.0               | 1.23           | 83.03           | 102.0                             | 1.15           | 40.08           | 101.9                                            | 1.23           | 80.56           |
| Si2p1       | 102.6               | 1.23           | 0.00            | 102.6                             | 1.15           | 0.00            | 102.5                                            | 1.23           | 0.00            |
| Si2p3       | 103.5               | 1.23           | 16.97           | 103.5                             | 1.39           | 59.92           | 103.3                                            | 1.23           | 19.44           |
| Si2p1       | 104.1               | 1.23           | 0.00            | 104.1                             | 1.39           | 0.00            | 103.9                                            | 1.23           | 0.00            |
|             | PDMS Composite film |                |                 | Plasma etched PDMS Composite film |                |                 | Plasma etched PDMS Composite film healed by heat |                |                 |
| <i>Name</i> | <i>Peak BE</i>      | <i>FWHM eV</i> | <i>Atomic %</i> | <i>Peak BE</i>                    | <i>FWHM eV</i> | <i>Atomic %</i> | <i>Peak BE</i>                                   | <i>FWHM eV</i> | <i>Atomic %</i> |
| C1s         | 284.6               | 1.09           | 93.38           | 284.5                             | 1.20           | 87.39           | 284.5                                            | 1.09           | 93.62           |
| C1s         | 285.6               | 1.15           | 4.51            | 285.6                             | 1.15           | 5.93            | 285.6                                            | 1.15           | 4.66            |
| C1s         | 286.8               | 1.16           | 1.34            | 286.8                             | 1.16           | 3.69            | 286.8                                            | 1.16           | 0.89            |
| C1s         | 288.1               | 1.15           | 0.54            | 288.1                             | 1.15           | 1.39            | 288.1                                            | 1.15           | 0.54            |
| C1s         | 289.5               | 1.16           | 0.24            | 289.5                             | 1.16           | 1.59            | 289.5                                            | 1.16           | 0.28            |
|             | PDMS Composite film |                |                 | Plasma etched PDMS Composite film |                |                 | Plasma etched PDMS Composite film healed by heat |                |                 |
| <i>Name</i> | <i>Peak BE</i>      | <i>FWHM eV</i> | <i>Atomic %</i> | <i>Peak BE</i>                    | <i>FWHM eV</i> | <i>Atomic %</i> | <i>Peak BE</i>                                   | <i>FWHM eV</i> | <i>Atomic %</i> |
| O1s         | 532.4               | 1.27           | 92.55           | 532.4                             | 1.27           | 45.74           | 532.2                                            | 1.27           | 91.98           |
| O1s         | 533.5               | 1.23           | 5.96            | 533.1                             | 1.23           | 49.95           | 533.0                                            | 1.23           | 6.64            |
| O1s         | 535.0               | 1.37           | 1.48            | 534.5                             | 1.37           | 4.30            | 534.5                                            | 1.37           | 1.38            |

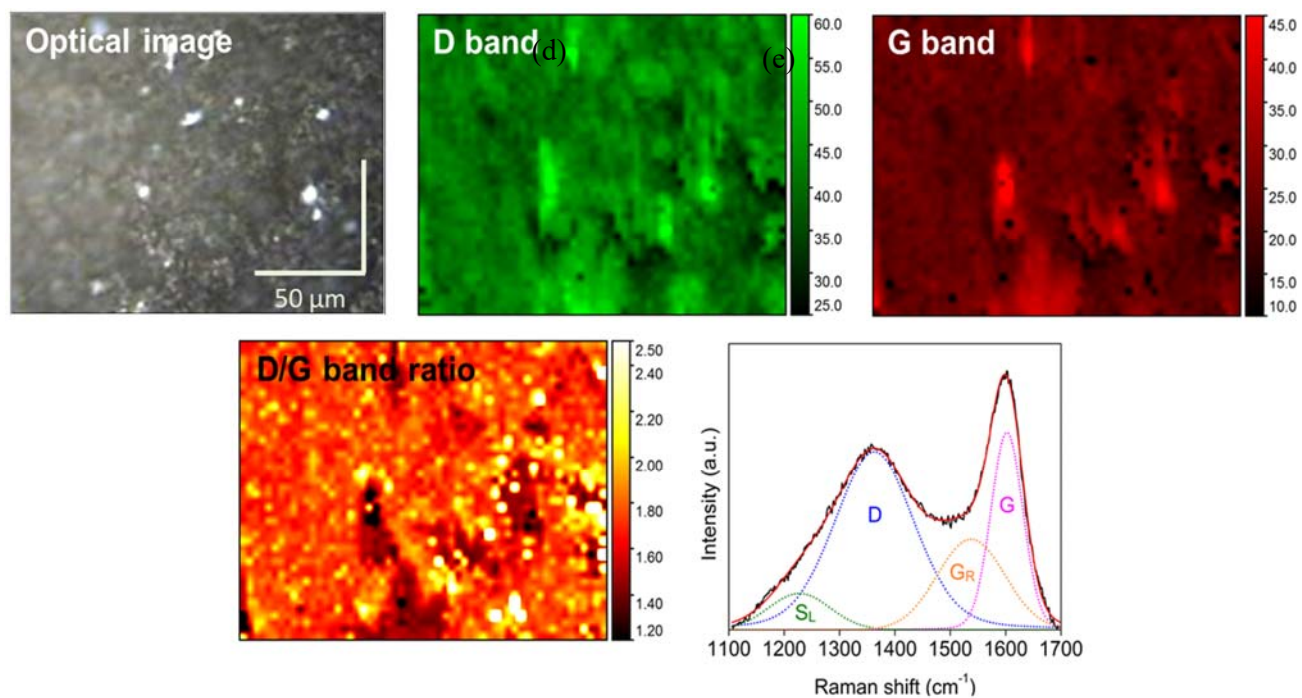

Figure S6. Chemical maps generated through Raman spectroscopy of Plain PDMS/camphor soot composite film. a) Optical CCD image. b) *D* band (mapping region: 1350-1365  $\text{cm}^{-1}$ ). c) *G* band (mapping region: 1537-1540  $\text{cm}^{-1}$ ). d) *D/G* band ratio. e) Raman spectral acquisition at 514 nm (from 1100 to 1700  $\text{cm}^{-1}$ )



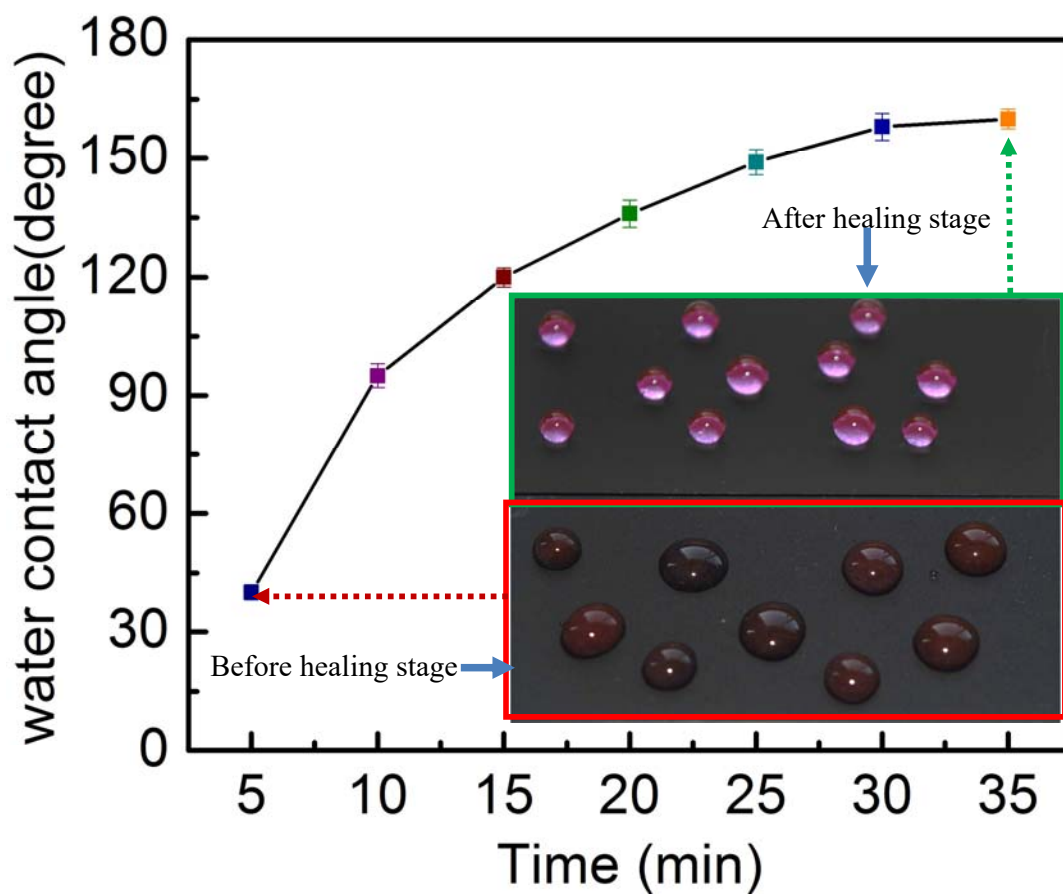

Figure S7. The variation of water CA on the 1 M Nitric acid solution treated surface along with the healing time at 50 °C. Inset images shows the shape of droplets before healing and after healing stage

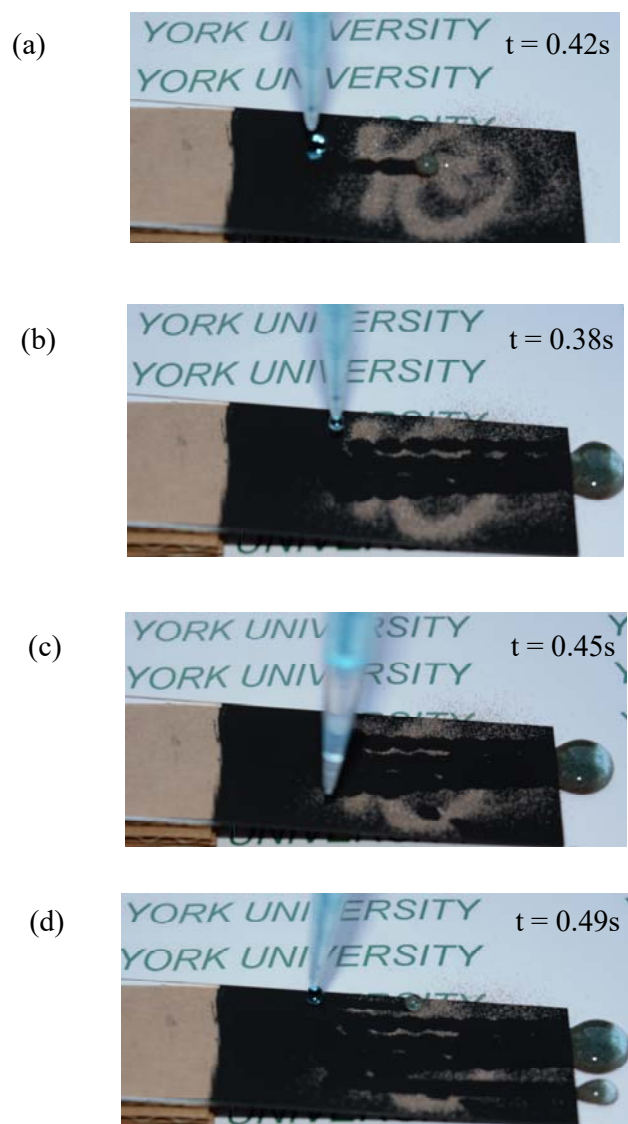

Figure S8. Time lapse snap shots for self-cleaning effect of Nitric acid solution treated PDMS/camphor soot composite surface healed by THF (at  $TA = 7.3^{\circ}$ ).

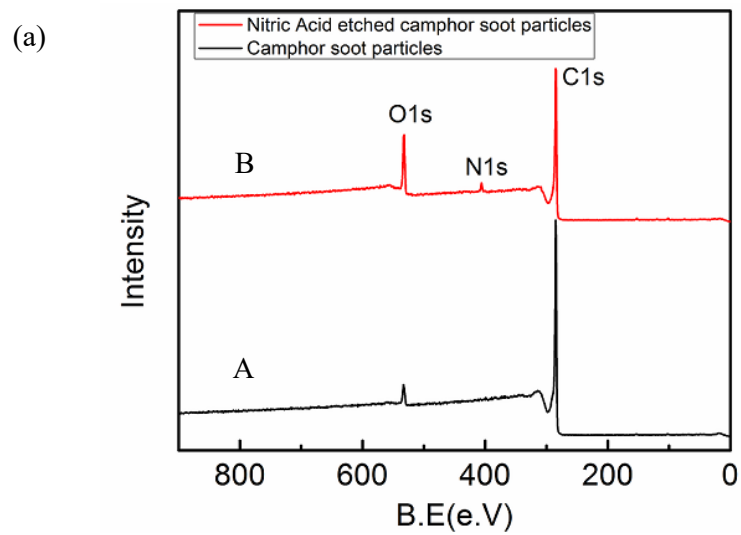

(b)

| Peaks    | Si2p     | C1s      | O1s      | N1s      |
|----------|----------|----------|----------|----------|
| Position | Rel. At% | Rel. At% | Rel. At% | Rel. At% |
| A        | 0.51     | 94.36    | 5.13     |          |
| B        | 0.93     | 81.53    | 2.81     | 14.74    |

Figure S9. a) XPS spectra of Camphor soot particles and Nitric acid etched camphor soot particles. b) Atomic percentage of Si2p, C1s and O1s of A: Camphor soot particles, B: Nitric acid etched camphor soot particles

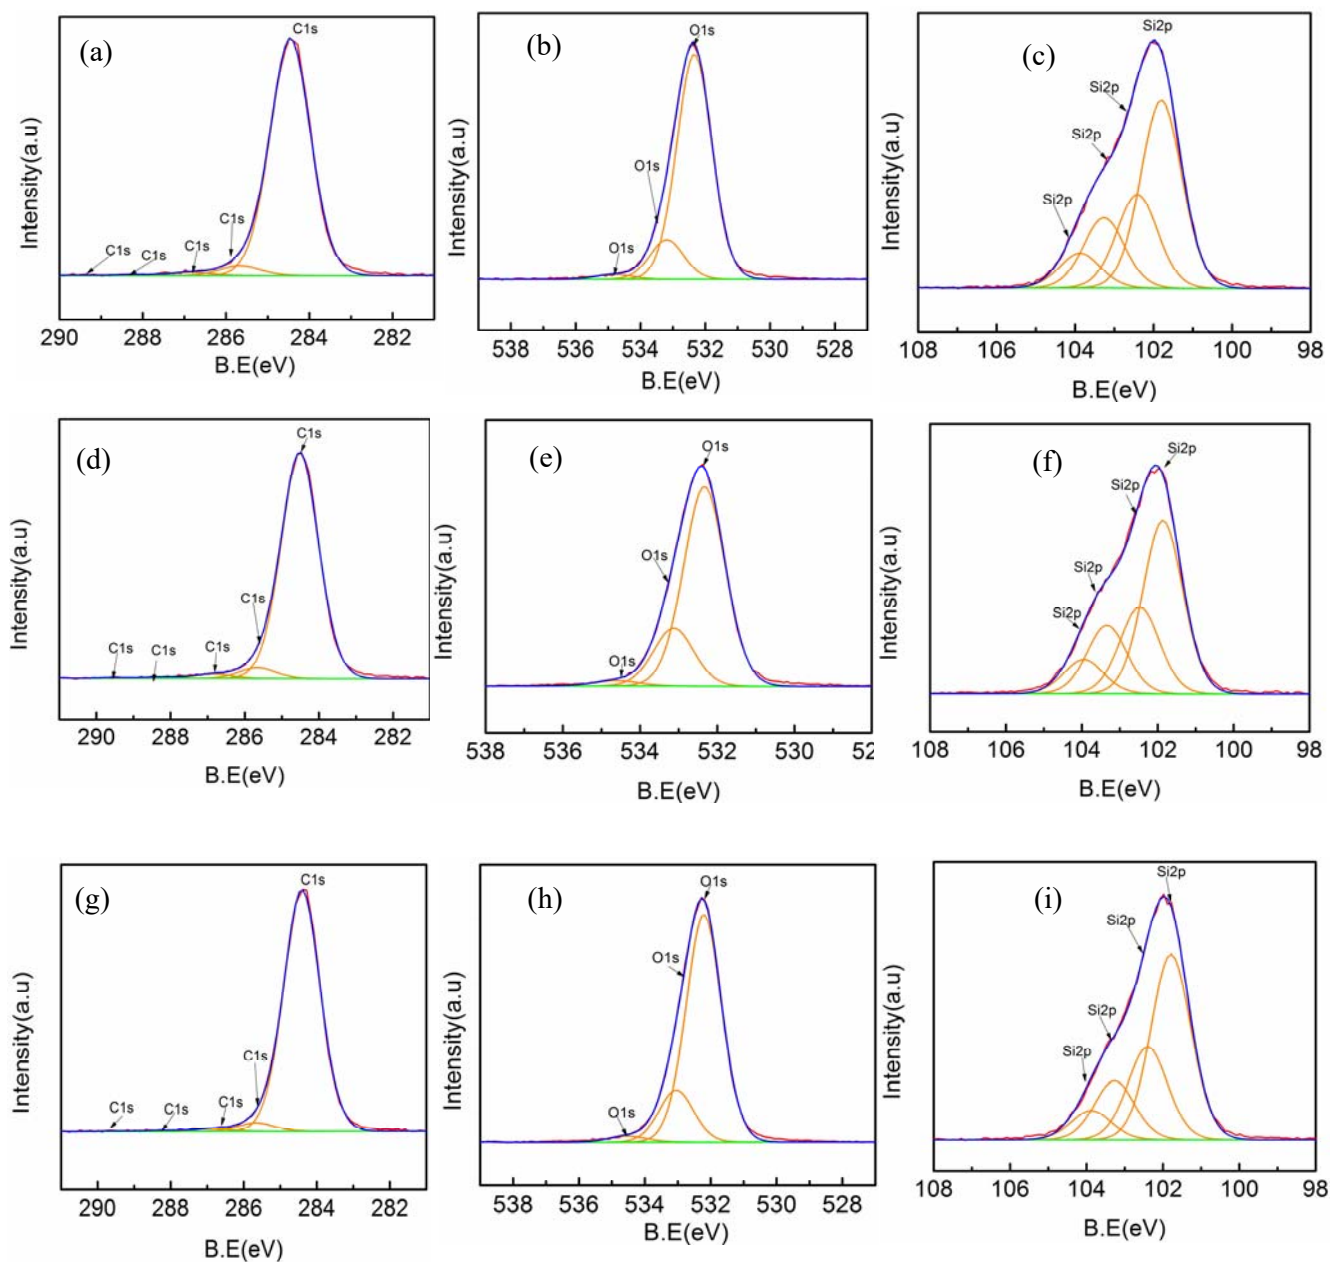

Figure S10. a) C1s spectra. b) O1s spectra. c) Si2p spectra of 1M HNO<sub>3</sub> solution treated PDMS/camphor soot composite films, d) C1s spectra. e) O1s spectra. f) Si2p spectra of 1M HNO<sub>3</sub> solution treated PDMS/camphor soot composite films healed by heat, g) C1s spectra. h) O1s spectra. i) Si2p spectra of 1M HNO<sub>3</sub> solution treated PDMS/camphor soot composite film healed by THF and heat.

Table S3. Atomic percentage of C1s, O1s and Si2p peaks of 1M HNO<sub>3</sub> solution treated PDMS/camphor soot composite films, and PDMS/camphor soot composite film healed by both THF and heat.

|             | PDMS Composite film etched in 1M Nitric acid |                |                 | Nitric acid etched PDMS Composite film healed by heat |                |                 | Nitric acid etched PDMS Composite film healed by THF and heat |                |                 |
|-------------|----------------------------------------------|----------------|-----------------|-------------------------------------------------------|----------------|-----------------|---------------------------------------------------------------|----------------|-----------------|
| <i>Name</i> | <i>Peak BE</i>                               | <i>FWHM eV</i> | <i>Atomic %</i> | <i>Peak BE</i>                                        | <i>FWHM eV</i> | <i>Atomic %</i> | <i>Peak BE</i>                                                | <i>FWHM eV</i> | <i>Atomic %</i> |
| Si2p3       | 101.8                                        | 1.23           | 72.76           | 101.8                                                 | 1.23           | 71.70           | 101.8                                                         | 1.23           | 75.79           |
| Si2p1       | 102.4                                        | 1.23           | 0.00            | 102.4                                                 | 1.23           | 0.00            | 102.4                                                         | 1.23           | 0.00            |
| Si2p3       | 103.3                                        | 1.23           | 27.24           | 103.3                                                 | 1.23           | 28.30           | 103.3                                                         | 1.23           | 24.21           |
| Si2p1       | 103.8                                        | 1.23           | 0.00            | 103.9                                                 | 1.23           | 0.00            | 103.8                                                         | 1.23           | 0.00            |
|             | PDMS Composite film etched in 1M Nitric acid |                |                 | Nitric acid etched PDMS Composite film healed by heat |                |                 | Nitric acid etched PDMS Composite film healed by THF and heat |                |                 |
| <i>Name</i> | <i>Peak BE</i>                               | <i>FWHM eV</i> | <i>Atomic %</i> | <i>Peak BE</i>                                        | <i>FWHM eV</i> | <i>Atomic %</i> | <i>Peak BE</i>                                                | <i>FWHM eV</i> | <i>Atomic %</i> |
| C1s         | 284.5                                        | 1.13           | 94.14           | 284.5                                                 | 1.19           | 93.00           | 284.5                                                         | 1.16           | 94.84           |
| C1s         | 285.6                                        | 1.15           | 3.87            | 285.6                                                 | 1.15           | 4.25            | 285.6                                                         | 1.15           | 3.42            |
| C1s         | 286.8                                        | 1.16           | 1.37            | 286.8                                                 | 1.16           | 1.77            | 286.8                                                         | 1.16           | 1.13            |
| C1s         | 288.1                                        | 1.15           | 0.39            | 288.1                                                 | 1.15           | 0.61            | 288.1                                                         | 1.15           | 0.41            |
| C1s         | 289.5                                        | 1.16           | 0.23            | 289.5                                                 | 1.16           | 0.37            | 289.5                                                         | 1.16           | 0.19            |
|             | PDMS Composite film etched in 1M Nitric acid |                |                 | Nitric acid etched PDMS Composite film healed by heat |                |                 | Nitric acid etched PDMS Composite film healed by THF and heat |                |                 |
| <i>Name</i> | <i>Peak BE</i>                               | <i>FWHM eV</i> | <i>Atomic %</i> | <i>Peak BE</i>                                        | <i>FWHM eV</i> | <i>Atomic %</i> | <i>Peak BE</i>                                                | <i>FWHM eV</i> | <i>Atomic %</i> |
| O1s         | 532.3                                        | 1.27           | 83.58           | 532.3                                                 | 1.27           | 76.19           | 532.3                                                         | 1.27           | 79.98           |
| O1s         | 533.1                                        | 1.23           | 14.43           | 533.1                                                 | 1.23           | 21.53           | 533.0                                                         | 1.23           | 17.68           |
| O1s         | 534.8                                        | 1.37           | 1.99            | 534.6                                                 | 1.37           | 2.27            | 534.5                                                         | 1.37           | 2.34            |
